# Supplementary material for: Improving the Gastrointestinal Tolerability of Fumaric Acid Esters: Early Findings on Gastrointestinal Events with Diroximel Fumarate in Patients with Relapsing-Remitting Multiple Sclerosis from the Phase 3, Open-Label EVOLVE-MS-1 Study
Source: Springer Nature journal article supplement (doi:10.1007/s12325-019-01085-3), 2019-09-19
Supplement: MOESM1 [file 17189822]

**Supplementary Appendix**

**Table 1. Listing of local ethics committees**

| **Name and Address of Local Ethics Committee** |
| --- |
| The Ottawa Health Science Network Research Ethics Board |
| 725 Parkdale Avenue |
| Ottawa, Ontario, Canada K1Y 4E9 |
| Western IRB |
| 1019 39th Avenue SE Suite 120 |
| Puyallup, WA 98374 |
| Copernicus Group IRB |
| One Triangle Drive Suite 100 |
| Durham, NC 27713 |
| Saint Louis University Institutional Review Board |
| 3556 Caroline St. |
| St. Louis, MO 63104 |
| Indiana University Institutional Review Board |
| 980 Indiana Avenue |
| Lockefield, Room 3315 |
| Indianapolis, IN 36202 |
| Providence Health & Services Institutional Review Board |
| 5251 NE Glisan Street |
| Portland, OR 97213 |
| The Washington University in St. Louis Institutional Review Board |
| 660 South Euclid Ave., CB 8089 |
| St. Louis, MO 63110 |
|  |
| Committee for the Protection of Human Subjects |
| 6410 Fannin St., Suite 1100 |
| Houston, TX 77030 |
|  |
| Sutter Health Institutional Review Board |
| 2121 N. California Blvd. |
| Walnut Creek, CA 94596 |
| Georgetown University Institutional Review Board |
| 3900 Reservoir Rd NW |
| Washington, DC 20057 |
|  |
| Chesapeake IRB |
| 6940 Columbia Gateway Drive, Suite 110 |
| Columbia, MD 21046 |
|  |
| Wake Forest University Health Sciences Institutional Review Board |
| Medical Center Boulevard |
| Winston-Salem, NC 27157 |
|  |
| Loma Linda University Adventist Health Sciences Center IRB |
| Research Protection Programs |
| 24887 Taylor Street, Suite 202 |
| Loma Linda, CA 92350 |
| BioMed IRB |
| P.O. Box 600870 |
| San Diego, CA 92160 |
| Mercy Medical Center Des Moines Institutional Review Board |
| 1111 6th Ave. |
| Des Moines, IA 50314 |
|  |
| UNM Human Research Protections Office |
| 1 University of New Mexico, MSC:08-4560 |
| Albuquerque, NM 87131 |
|  |
| Upstate Medical University Institutional Review Board |
| Weiskotten Hall, Rm. 1109 |
| Syracuse, NY 13210 |
|  |
| Henry Ford Health System Research Administration, IRB |
| One Ford Place, Suite 2-F |
| Detroit, MI 48202 |
|  |
| OMRF IRB |
| 825 NE 13th Street |
| Oklahoma City, OK 73104 |
| Ethisch Comité AZ Sint-Jan Brugge-Oostende Ruddershove 10 Brugge Belgium 8000 |
| Ethics Committee for Multicenter Trials 8, Damyan Gruev Str. Sofia Bulgaria 1303 |
| Ethik-Kommission der Landesärztekammer Baden-Württemberg Jahnstraße 40 Stuttgart  Germany 70597 |
| Ethikkommission Technische Universität Dresden Fetscherstraße 74 Dresden Germany 01307 |
| Ethik-Kommission der Ärztekammer Niedersachsen Berliner Allee 20 Hannover Germany 30175 |
| Landesamt für Gesundheit und SozialesGeschäftsstelle der Ethik- Kommission des Landes Berlin;  Turmstraße 21: 10559 Berlin |
| Ethik-Kommission an der Medizinischen Fakultät der Universität Leipzig Haus: Karl-Sudhoff-Institut Käthe-Kollwitz-Straße 82 Leipzig Germany 04109 |
| Ethikkommission der Universität Ulm Helmholtzstraße 20 (Oberer Eselsberg) Ulm Germany 89081 |
| Komisja Bioetyczna przy Uniwersytecie Medycznym w Łodzi Plac Hallera 1B Łódź Poland 90-647 |
| Independant Ethics Commitee of the NRSBHI “City Clinical Hospital No. 3”  21, Verkhnevolzhskaya nab. Nizhny Novgorod Russia 603155 |
| Local Ethics Committee of the Federal State Budget Institution “Federal Siberian Research Clinical Centre of the Federal Medical Biological Agency of Russia” 26, Kolomenskaya str. Krasnoyarsk Krasnoyarsk’s region Russia 660037 |
| CEIC Hospital General Universitario Gregorio Marañón Pabellón de Gobierno, 1ª planta C/ Dr. Esquerdo, 46 Madrid Spain 28007 |
| Ethics Committee of Communal institution "Odesa Regional Clinical Hospital" 26 Zabolotnogo Str. Odesa Ukraine 65000 |
| Commission on Ethics and Deontology of State Institution "Institute of Neurology Psychiatry and Narcology of National Academy of Medical Sciences of Ukraine” 46 Akademika Pavlova str. Kharkiv Ukraine 61068 |
| Ethics Committee of Lviv Regional Clinical Hospital 7 Chernihivska Str. Lviv Ukraine 79000 |
| The Ethics Committee of Kharkiv Railway Clinical Hospital #1 of Branch “Health Center” of the Public joint stock company “Ukrainian Railway”  5 Balakireva lane Kharkiv Ukraine 61103 |
| Ethics Committee of Communal Institution «Zaporizhzhya Regional Clinical Hospital» of Zaporizhzhya regional Council 10 Orekhivske shose Zaporizhzhya Ukraine 69600 |
| Ethics Committee of Ivano-Frankivsk Regional Clinical Hospital 91 Fedkovycha Str. Ivano-Frankivsk Ukraine 76000 |
| Ethics Committee of Communal Institution «Zaporizhzhya City Multiple Discipline Clinical Hospital #9» 1 Shastlyva str. Zaporizhzhya  Ukraine 69065 |
| Ethics Committee of Communal institution “Dnipropetrovsk regional clinical hospital after Mechnikov I.I.” 14 Soborna sq. Dnipro Ukraine 49005 |
| Ethics Committee of State Institution "Institute of Neurology Psychiatry and Narcology of National Academy of Medical Sciences of Ukraine” 46, Akademika Pavlova Str. Kharkiv Ukraine 61068 |
| Local Ethics Committee of Clinical Center Kragujevac Zmaj Jovina 30 Kragujevac Serbia 34000 |
| Local Ethics Committee of Military Medical Academy Crnotravska 17 Belgrade Serbia 11000 |
| Local Ethics Committee of Zvezdara University Medical Center Dimitrija Tucovica 161 Belgrade Serbia 11000 |
| Local Ethics Committee of Clinical Center Nis Bulevar dr Zorana Đinđića 48 Nis Serbia 18000 |
| Local Ethics Committee of Clinical Center of Serbia Dr. Subotica 6 Belgrade Serbia 11000 |
